# Supplementary material for: RYBP-PRC1 Complexes Mediate H2A Ubiquitylation at Polycomb Target Sites Independently of PRC2 and H3K27me3
Source: PubMed Central journal article supplement (PMC3281992; doi:10.1016/j.cell.2011.12.029), 2012-02-17
Supplement: mmc1.pdf [file mmc1.pdf]

Table S1. PCR Primers, Related to Experimental Procedures

| <b>ChIP primer name</b>   | <b>Sequence (5'-3')</b>      |
|---------------------------|------------------------------|
| Oct4F                     | GTGAGCCGTCTTTCCACCAGG        |
| Oct4 R                    | GGGTGAGAAGGCCGAAGTCTGAA      |
| Sox2F                     | CCATCCACCCTTATGTATCCAAG      |
| Sox2R                     | CGAAGGAAGTGGGTAAACAGCAC      |
| NanogF                    | CCCAGGTTTCCCAATGTGAAG        |
| NanogR                    | AAAGAGTCAGACCTTGCTGCCA       |
| mRPS14F                   | GACCAAGACCCCTGGACCT          |
| mRPS14R                   | CCCCTTTTCTTCGAGTGCTA         |
| EnsaF                     | ATGCAACATTCAGCGACTTG         |
| EnsaR                     | CTAGAACACCAACCGGGAAA         |
| B2mF                      | GCATCAACAGCTAGGGACTGGTGAC    |
| B2mR                      | CCGAGTAGCAGCCACTGAAATGAG     |
| Gata4F                    | AAGAGCGCTTGCGTCTCTA          |
| Gata4R                    | TTGCTAGCCTCAGATCTACGG        |
| Math1F                    | CCTTCTTTGACTGGGCAGAC         |
| Math1R                    | ACTCGGAGATCGCACACC           |
| Nkx2-2F                   | CAGGTTTCGTGAGTGGAGCCC        |
| Nkx2-2R                   | GCGCGGCCTCAGTTTGTAAC         |
| Hoxa7F                    | GAGAGGTGGGCAAAGAGTGG         |
| Hoxa7R                    | CCGACAACCTCATACCTATTCCTG     |
| Msx1F                     | ACAGAAAGAAATAGCACAGACCATAAGA |
| Msx1R                     | TTCTACCAAGTTCAGAGGGACTTT     |
| Cdx2F                     | GGA CTCCGCGAGCCAA            |
| Cdx2R                     | CTCAGCCCACGGTGCTC            |
| Pax3F                     | CGGACGAGTTTGGTGCGAGT         |
| Pax3R                     | TGTTCTGCCTCGTCACCAC          |
| Sox1F                     | ACAAGAGGAGGCAGCGAACC         |
| Sox1R                     | TCGCAGGTGGAAAGTTTCTCC        |
| Gata1F                    | AGAGGAGGGAGAAGGTGAGTG        |
| Gata1R                    | AGCCACCTTAGTGGTATGACG        |
| <b>RT-PCR primer name</b> | <b>Sequence (5'-3')</b>      |
| Gapdh F                   | CCCACCTTGCCCTCTGTATTGG       |
| Gapdh R                   | CTGTGGGGAGTCCTTTTCAG         |
| ldhF                      | AGAAAATGTGGAAGAGCCCTAACG     |
| ldhR                      | TGCCAGCTCGATCTACCACAAAAT     |
| HmbsF                     | CTGTACCTGACTGGTGGAGTCTGGAGTC |
| HmbsR                     | TGATGCCCAGGTTCTCAGCAGCT      |
| Oct4F                     | CGTGGAGACTTTGCAGCCTG         |
| Oct4 R                    | GCTTGGCAAACCTGTTCTAGCTCCT    |
| Sox2F                     | CATGTGAGGGCTGGACTGCG         |

|        |                             |
|--------|-----------------------------|
| NanogF | GAACTATTCTTGCTTACAAGGGTCTGC |
| NanogR | GCATCTTCTGCTTCCTGGCAA       |
| Gata4F | GAGGCTCAGCCGCAGTTGCAG       |
| Gata4R | CGGCTAAAGAAGCCTAGTCCTTGCTT  |
| Cdx2F  | TCAACCTCGCCACAACCTTCCC      |
| Cdx2R  | TGGCTCAGCCTGGGATTGCT        |
| Pax3F  | CCCAGTGAGAGGGGAGAGAGCATA    |
| Pax3R  | CTTCGAACGCAGACAGCAGC        |
| Gata1F | GTCCTCACCATCAGATTCCACAG     |
| Gata1R | AGTGGATACACCTGAAAGACTG      |
